# Supplementary material
Source: PubMed Central journal article supplement (PMC2752554)
Supplement: 0905207106_0905207106SI.pdf [file 0905207106_0905207106SI.pdf]

# Supporting Information

Taraska et al. 10.1073/pnas.0905207106

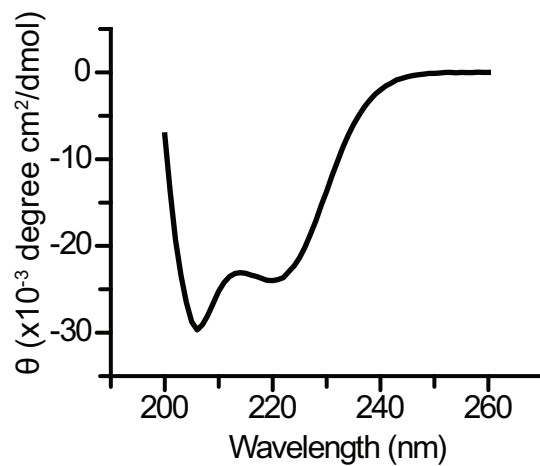

**Fig. S1.** Circular dichroism spectrum of C2H6H10 peptide. Spectra were acquired by using an Aviv model 62A DS spectrometer (Aviv Biomedical) with a 1-mm path-length quartz cuvette. Peptides were dissolved to a final concentration of  $\approx 500 \mu\text{M}$  in buffer containing 65 mM  $\text{Na}_2\text{SO}_4$ , 1.5 mM  $\text{KH}_2\text{PO}_4$ , and 1.5 mM  $\text{K}_2\text{HPO}_4$ , pH 7.2, in 50% 2,2,2-trifluoroethanol.
